# Supplementary material for: Resveratrol, Curcumin and Piperine Alter Human Glyoxalase 1 in MCF-7 Breast Cancer Cells
Source: Int J Mol Sci. 2020 Jul 24;21(15):5244. doi: 10.3390/ijms21155244 (PMC7432303; doi:10.3390/ijms21155244)
Supplement: Supplementary file 1 [file ijms-21-05244-s001.pdf]

## Supplementary Material

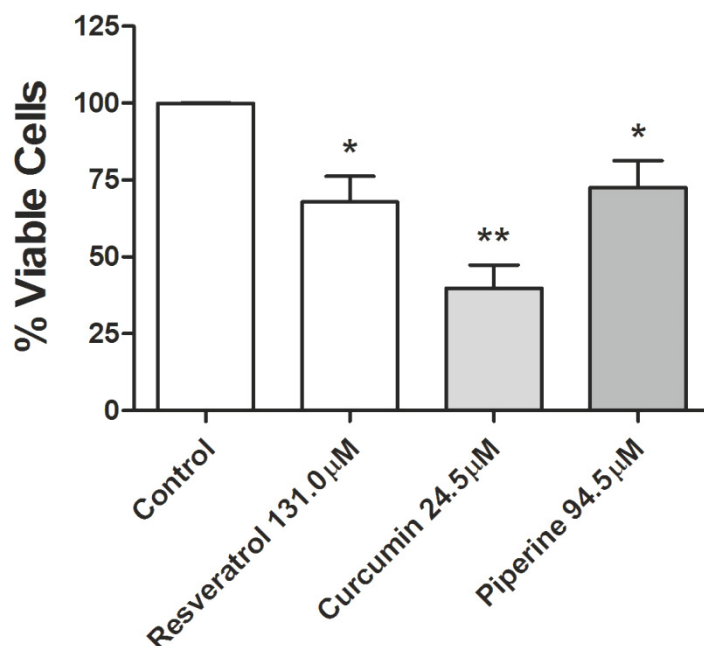

**Supplementary Figure 1. Effects of resveratrol, curcumin and piperine on the cell viability of MCF-7 cells.** Cells were treated for 24 hours with 131.0  $\mu$ M resveratrol, 24.5  $\mu$ M curcumin or 94.5  $\mu$ M piperine, and the cell viability was then determined by trypan blue dye exclusion assay. The results are representative of three experiments performed in triplicate  $\pm$  SEM. \*  $p < 0.05$ , \*\*  $p < 0.001$ , in relation of control.

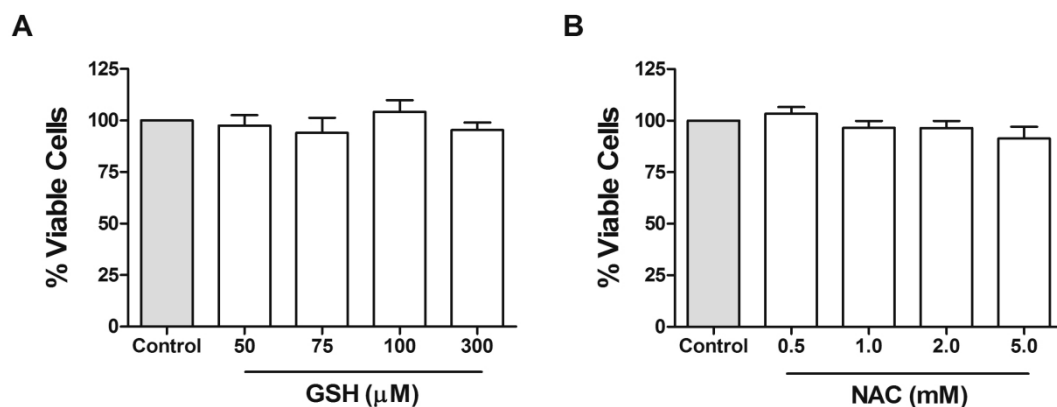

**Supplementary Figure 2. Effects of GSH and NAC on the cell viability of MCF-7 cells.** Cells were treated for 24 hours with 50.0, 75.0, 100.0 and 300  $\mu$ M GSH (A) or 0.5, 1.0, 2.0, 5.0 mM NAC (B), and the cell viability was then determined by MTT assay. The results are representative of three experiments performed in triplicate  $\pm$  SEM.

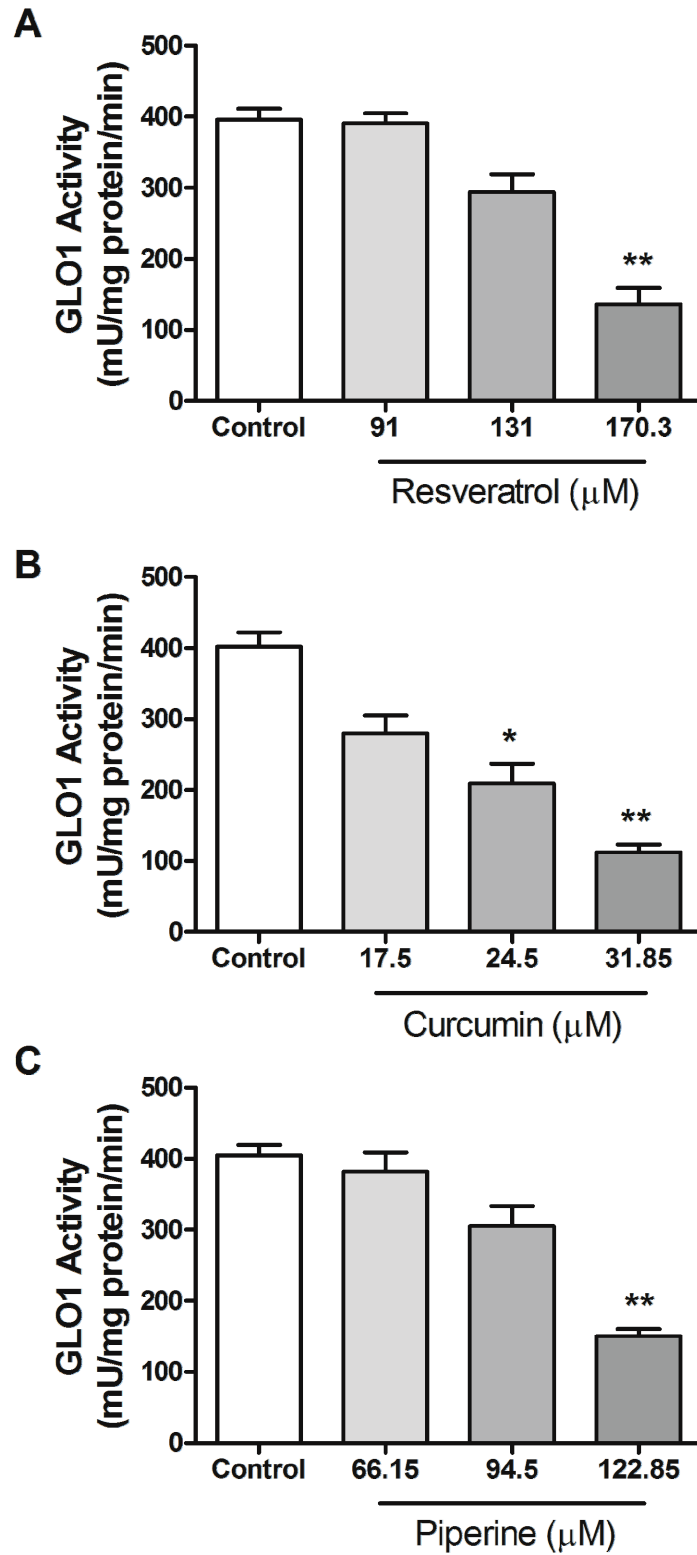

**Supplementary Figure 3. GLO1 activity in MCF-7 cells after treatment of resveratrol, curcumin and piperine.** Cells were treated with 91.0, 131.0 and 170.3  $\mu$ M resveratrol, 17.5, 24.5 and 31.85  $\mu$ M curcumin or 66.15, 94.5 and 122.85  $\mu$ M piperine. After 24 hours, the GLO1 activity was measured in the extracts of lysed cells. The results are representative of three experiments performed in triplicate  $\pm$  SEM. \*  $p < 0.05$ , \*\*  $p < 0.001$ , in relation of control.

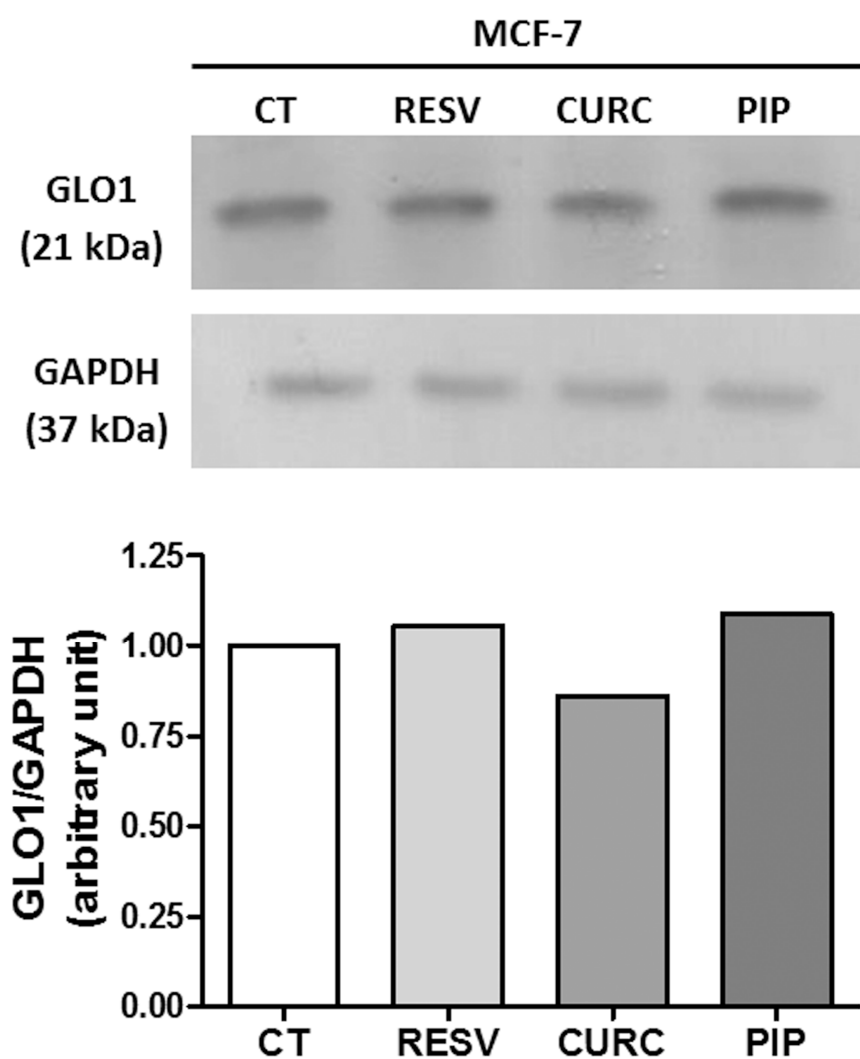

**Supplementary Figure 4. Resveratrol, curcumin and piperine effect on GLO1 in MCF-7 cells at the protein level.** MCF-7 cells after resveratrol (RESV), curcumin (CURC) and piperine (PIP) treatment with IC<sub>50</sub> values, respectively, were submitted to Western blot analysis under denaturing conditions. The values were expressed in arbitrary units.
